# Supplementary material for: Characterization of Molecular Subtypes in Head and Neck Squamous Cell Carcinoma With Distinct Prognosis and Treatment Responsiveness
Source: Front Cell Dev Biol. 2021 Sep 14;9:711348. doi: 10.3389/fcell.2021.711348 (PMC8476885; doi:10.3389/fcell.2021.711348)
Supplement: Supplementary file 1 [file Data_Sheet_1.XLSX]

## Sheet: Table S1
HALLMARK terms	Gene
HALLMARK_UV_RESPONSE_UP/HALLMARK_MTORC1_SIGNALING	YKT6
HALLMARK_UV_RESPONSE_UP/HALLMARK_MTORC1_SIGNALING	STIP1
HALLMARK_UV_RESPONSE_UP/HALLMARK_MTORC1_SIGNALING	RPN1
HALLMARK_UV_RESPONSE_UP/HALLMARK_MTORC1_SIGNALING	PDAP1
HALLMARK_UV_RESPONSE_UP	TCHH
HALLMARK_UV_RESPONSE_UP	SHOX2
HALLMARK_UV_RESPONSE_UP	RFC4
HALLMARK_UV_RESPONSE_UP	PPT1
HALLMARK_UV_RESPONSE_UP	PPAT
HALLMARK_UV_RESPONSE_UP	MMP14
HALLMARK_UV_RESPONSE_UP	ICAM1
HALLMARK_UV_RESPONSE_UP	HTR7
HALLMARK_UV_RESPONSE_UP	HSPA13
HALLMARK_UV_RESPONSE_UP	HLA-F
HALLMARK_UV_RESPONSE_UP	GLS
HALLMARK_UV_RESPONSE_UP	GGH
HALLMARK_UV_RESPONSE_UP	FURIN
HALLMARK_UV_RESPONSE_UP	FEN1
HALLMARK_UV_RESPONSE_UP	EPCAM
HALLMARK_UV_RESPONSE_UP	ENO2
HALLMARK_UV_RESPONSE_UP	CTSV
HALLMARK_UV_RESPONSE_UP	CHRNA5
HALLMARK_UV_RESPONSE_UP	CDK2
HALLMARK_UV_RESPONSE_UP	CCNE1
HALLMARK_UV_RESPONSE_UP	BMP2
HALLMARK_UV_RESPONSE_UP	BID
HALLMARK_UV_RESPONSE_UP	BAK1
HALLMARK_UV_RESPONSE_UP	ATP6V1C1
HALLMARK_UNFOLDED_PROTEIN_RESPONSE/HALLMARK_MTORC1_SIGNALING/HALLMARK_UV_RESPONSE_UP	ASNS
HALLMARK_UNFOLDED_PROTEIN_RESPONSE/HALLMARK_MTORC1_SIGNALING	SLC7A5
HALLMARK_UNFOLDED_PROTEIN_RESPONSE/HALLMARK_MTORC1_SIGNALING	SLC1A4
HALLMARK_UNFOLDED_PROTEIN_RESPONSE/HALLMARK_MTORC1_SIGNALING	PSAT1
HALLMARK_UNFOLDED_PROTEIN_RESPONSE/HALLMARK_MTORC1_SIGNALING	MTHFD2
HALLMARK_UNFOLDED_PROTEIN_RESPONSE/HALLMARK_MTORC1_SIGNALING	HSPA5
HALLMARK_UNFOLDED_PROTEIN_RESPONSE/HALLMARK_MTORC1_SIGNALING	CALR
HALLMARK_UNFOLDED_PROTEIN_RESPONSE	YIF1A
HALLMARK_UNFOLDED_PROTEIN_RESPONSE	XPOT
HALLMARK_UNFOLDED_PROTEIN_RESPONSE	VEGFA
HALLMARK_UNFOLDED_PROTEIN_RESPONSE	STC2
HALLMARK_UNFOLDED_PROTEIN_RESPONSE	SHC1
HALLMARK_UNFOLDED_PROTEIN_RESPONSE	PDIA6
HALLMARK_UNFOLDED_PROTEIN_RESPONSE	PDIA5
HALLMARK_UNFOLDED_PROTEIN_RESPONSE	PARN
HALLMARK_UNFOLDED_PROTEIN_RESPONSE	LSM4
HALLMARK_UNFOLDED_PROTEIN_RESPONSE	IFIT1
HALLMARK_UNFOLDED_PROTEIN_RESPONSE	FKBP14
HALLMARK_UNFOLDED_PROTEIN_RESPONSE	EXOSC4
HALLMARK_UNFOLDED_PROTEIN_RESPONSE	EXOSC2
HALLMARK_UNFOLDED_PROTEIN_RESPONSE	DKC1
HALLMARK_UNFOLDED_PROTEIN_RESPONSE	CKS1B
HALLMARK_UNFOLDED_PROTEIN_RESPONSE	CEBPB
HALLMARK_UNFOLDED_PROTEIN_RESPONSE	ARFGAP1
HALLMARK_MTORC1_SIGNALING	TXNRD1
HALLMARK_MTORC1_SIGNALING	TUBG1
HALLMARK_MTORC1_SIGNALING	TRIB3
HALLMARK_MTORC1_SIGNALING	TOMM40
HALLMARK_MTORC1_SIGNALING	TMEM97
HALLMARK_MTORC1_SIGNALING	TFRC
HALLMARK_MTORC1_SIGNALING	STC1
HALLMARK_MTORC1_SIGNALING	STARD4
HALLMARK_MTORC1_SIGNALING	SQLE
HALLMARK_MTORC1_SIGNALING	SLC7A11
HALLMARK_MTORC1_SIGNALING	SLC2A3
HALLMARK_MTORC1_SIGNALING	SLC2A1
HALLMARK_MTORC1_SIGNALING	SHMT2
HALLMARK_MTORC1_SIGNALING	SERPINH1
HALLMARK_MTORC1_SIGNALING	SCD
HALLMARK_MTORC1_SIGNALING	RRM2
HALLMARK_MTORC1_SIGNALING	PSMG1
HALLMARK_MTORC1_SIGNALING	PSMD14
HALLMARK_MTORC1_SIGNALING	PSMB5
HALLMARK_MTORC1_SIGNALING	POLR3G
HALLMARK_MTORC1_SIGNALING	PNO1
HALLMARK_MTORC1_SIGNALING	PLOD2
HALLMARK_MTORC1_SIGNALING	PLK1
HALLMARK_MTORC1_SIGNALING	PGK1
HALLMARK_MTORC1_SIGNALING	P4HA1
HALLMARK_MTORC1_SIGNALING	NFIL3
HALLMARK_MTORC1_SIGNALING	MLLT11
HALLMARK_MTORC1_SIGNALING	MCM4
HALLMARK_MTORC1_SIGNALING	MCM2
HALLMARK_MTORC1_SIGNALING	LDHA
HALLMARK_MTORC1_SIGNALING	IFI30
HALLMARK_MTORC1_SIGNALING	HPRT1
HALLMARK_MTORC1_SIGNALING	HK2
HALLMARK_MTORC1_SIGNALING	GMPS
HALLMARK_MTORC1_SIGNALING	GLA
HALLMARK_MTORC1_SIGNALING	FADS2
HALLMARK_MTORC1_SIGNALING	FADS1
HALLMARK_MTORC1_SIGNALING	EIF2S2
HALLMARK_MTORC1_SIGNALING	DHCR7
HALLMARK_MTORC1_SIGNALING	DDX39A
HALLMARK_MTORC1_SIGNALING	CTSC
HALLMARK_MTORC1_SIGNALING	CDKN1A
HALLMARK_MTORC1_SIGNALING	CDC25A
HALLMARK_MTORC1_SIGNALING	CCNF
HALLMARK_MTORC1_SIGNALING	CACYBP
HALLMARK_MTORC1_SIGNALING	BUB1
HALLMARK_MTORC1_SIGNALING	BCAT1
HALLMARK_MTORC1_SIGNALING	AURKA
HALLMARK_MTORC1_SIGNALING	ACLY
